# Supplementary material for: Reduced acoustic resonator dimensions improve focusing efficiency of bacteria and submicron particles
Source: Royal Society of Chemistry journal article supplement (doi:10.1039/d1an01891d), 2021-11-30

Supplementary figures

**Reduced acoustic resonator dimensions improve focusing efficiency  
of bacteria and submicron particles**

Masashi Ugawa<sup>a</sup>, Hoyeon Lee<sup>b</sup> Minho Lee<sup>c</sup>, Soyun Kim<sup>d,e</sup>, OkChan Jeong<sup>f</sup>, Yong-Hoon Choi<sup>g</sup>, Daewon Sohn<sup>b</sup>, Thomas Laurell<sup>h</sup>, Sadao Ota<sup>\*a</sup>, SangWook Lee<sup>\*a,i</sup>

<sup>a</sup> RCAST, The University of Tokyo, 153-8904, Tokyo, Japan

<sup>b</sup> Department of Chemistry, Research Institute for Convergence of Basic Science, Hanyang University, Seoul, 04763, Korea

<sup>c</sup> School of integrative engineering, Chung-Ang University, Seoul, 06974, Korea

<sup>d</sup> Convergence Research Institute, Korea University, 02841, Seoul, Korea

<sup>e</sup> PCL Inc., 05854, Seoul, Korea

<sup>f</sup> Department of Biomedical Engineering, Inje University, Gimhae-si, 50834, Korea

<sup>g</sup> School of Robotics, KwangWoon University, 01897, Korea

<sup>h</sup> Department of Biomedical engineering, Lund University, 22363, Lund, Sweden

<sup>i</sup> Bio-health Product Research Center, Inje University, Gimhae-si, 50834, Korea

Corresponding: sadaota@solab.rcast.u-tokyo.ac.jp & swlee@g.ecc.u-tokyo.ac.jp

S-1. Focusing widths of beads were displayed by different flow condition. 1.3 $\mu\text{m}$  and 3 $\mu\text{m}$  beads were tested. The beads samples were injected using syringe pumps into inlet of the chip (see Fig. 2) and images of flowing particles were taken from the high-speed camera (1000 fps of frame rate and 20 $\mu\text{s}$  exposure time). Each particle's lateral distribution were measured from the center of the channel and plotted for histogram as in the figures. Based on calculated standard deviation ( $\sigma$ ) of each histogram, we plotted 2-standard deviation ( $2\text{-}\sigma$ ) in the fig.4-b as name of focusing width.

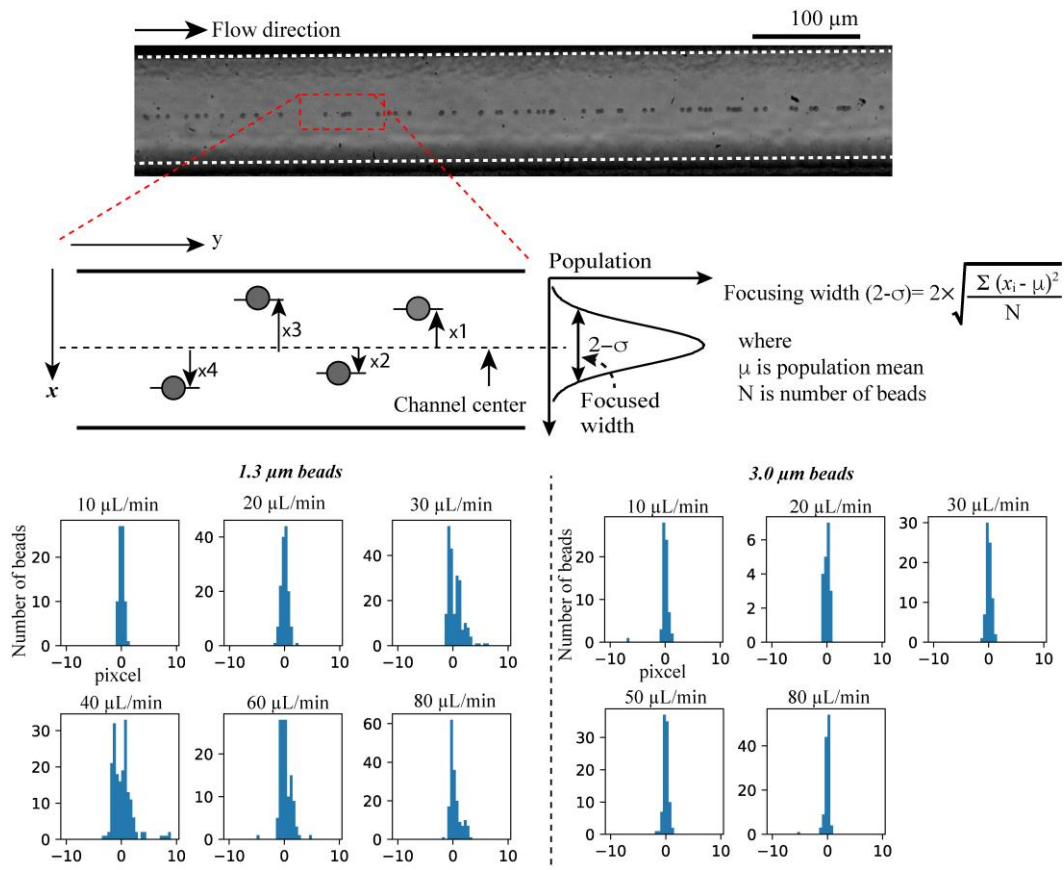

S-2. Focusing widths of bacteria were displayed by different flow condition. Bacteria stream of each flow conditions (see Fig.6-a) were observed and captured by Nikon DS-Ri2 CCD camera (exposure time of 100 $\mu$ s and frame rate of 30fps). The intensity profiles of cross section were obtained. After subtracting the background, peak detection was chosen to obtain the cross section of bacteria at a certain frame. Finally, the position of peaks for each frames were combined to obtain the histogram. . Based on calculated standard deviation ( $\sigma$ ) of each histogram, we plotted 2-standard deviation ( $2-\sigma$ ) in the fig.6-b as name of focusing width.

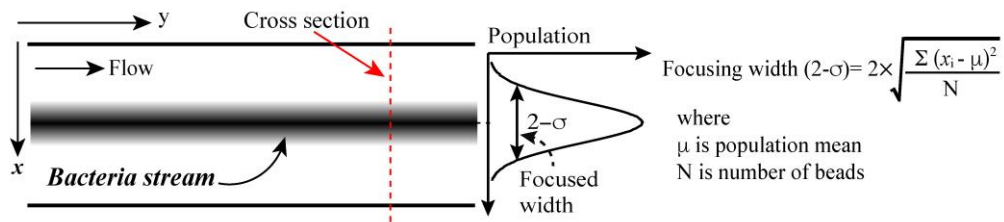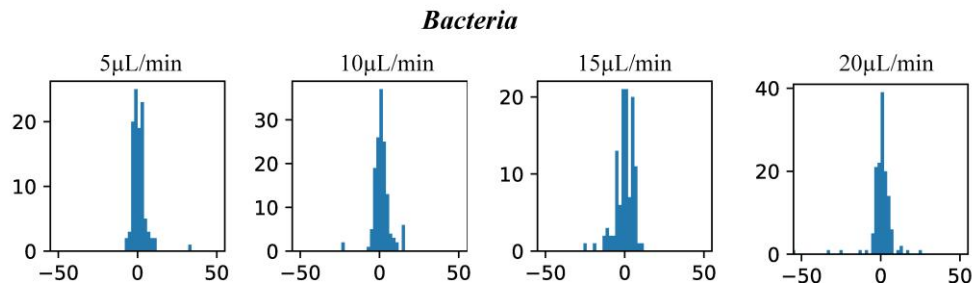

Supplement: d1an01891d1.pdf [file d1an01891d1.pdf]
